# Supplementary material for: A Recyclable Magnetic Biochar from Corn Cobs and Red Mud for Treating Complex Contaminants Containing Dyes and Heavy Metals
Source: Research Square preprint supplement (doi:10.21203/rs.3.rs-7662320/v1), 2025-10-06
Supplement: Supplementary file 1 [file f32275a0b3afef96e89fe7ab.docx]

Engineering a Waste-Derived Magnetic Biochar for Practical Treatment of Complex Wastewater Co-Contaminated with Dye and Lead

Ruihui Gong b, Huidong Li* a,b, Yuxin Liu b, Jiangzhe Fu b

a Inner Mongolia Key Laboratory of Green Construction and Intelligent Operation and Maintenance of Civil Engineering

b School of Civil Engineering, Inner Mongolia University of Technology, Hohhot 010051, PR China

*Corresponding author: Huidong Li.

Tel.: +86 15947032253.

E-mail address: lihuidong@imut.edu.cn

Table of content

| Fig.S1. | The SEM images of MMBC-400 |
| --- | --- |
| Fig.S2 | BET and VSM of MMBC-400 |
| Fig.S3 | XPS spectrum of MMBC-400, MG adsorption |
| Fig.S4 | XPS spectrum of MMBC-400, Pb2+adsorption |
| Fig.S5 | XPS spectrum of MMBC-400 after MG and Pb2+ adsorption |
| Fig.S6 | FTIR spectra of MMBC-400 before and after adsorption of MG and Pb2+. |
| Fig.S7 | Fig.S7. Effect of reuse times on adsorption performance |
| Table S1 | Isotherm fitting parameters of MMBC-400 for adsorbed MG and Pb2+ in binary systems |
| Table S2 | Table S2 Kinetic fitting parameters for MMBC-400 adsorption of MG and Pb2+ in a binary system |
| Table S3 | Thermodynamic parameters of MMBC-400 for adsorption of MG and Pb2+ in binary systems |


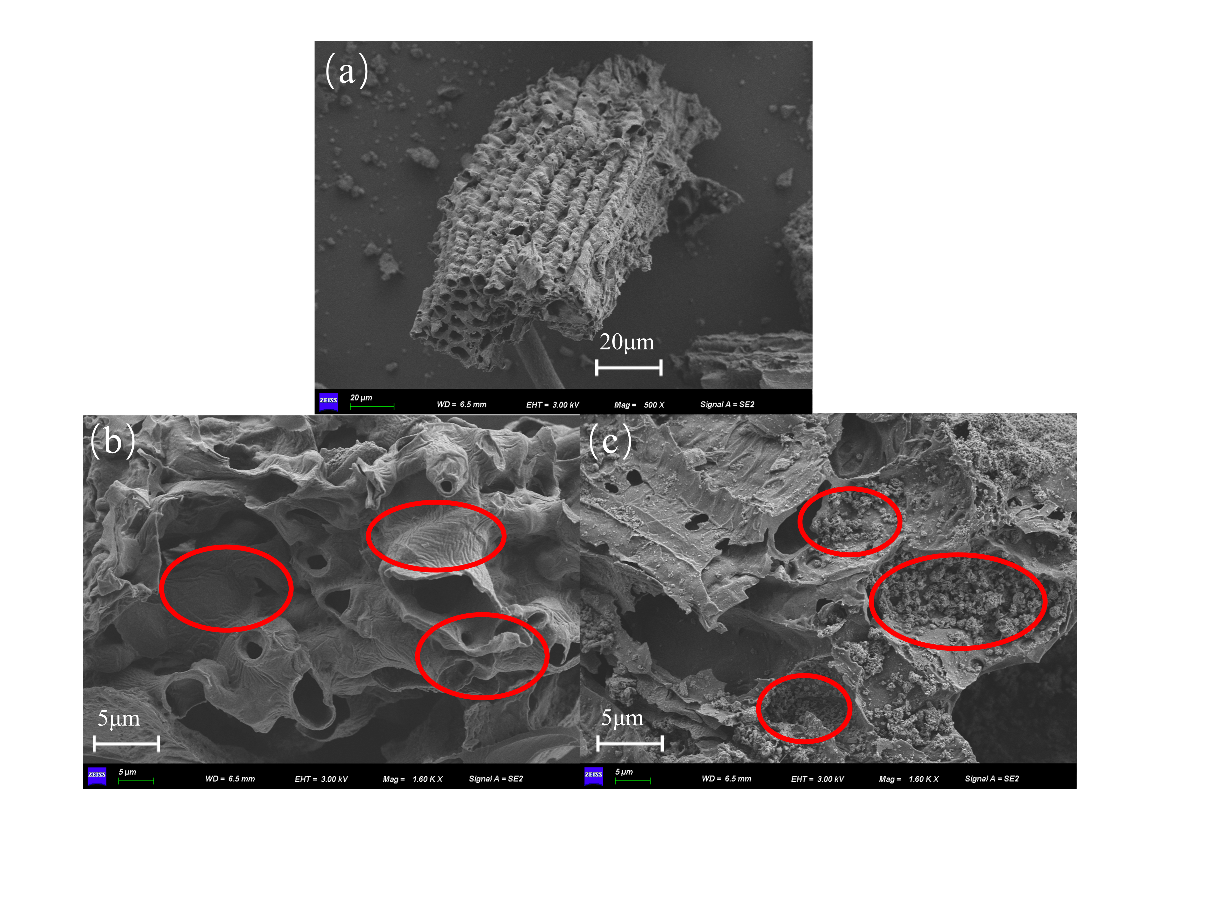


Fig. S1. The SEM images of MMBC-400 (a), (b), (c).


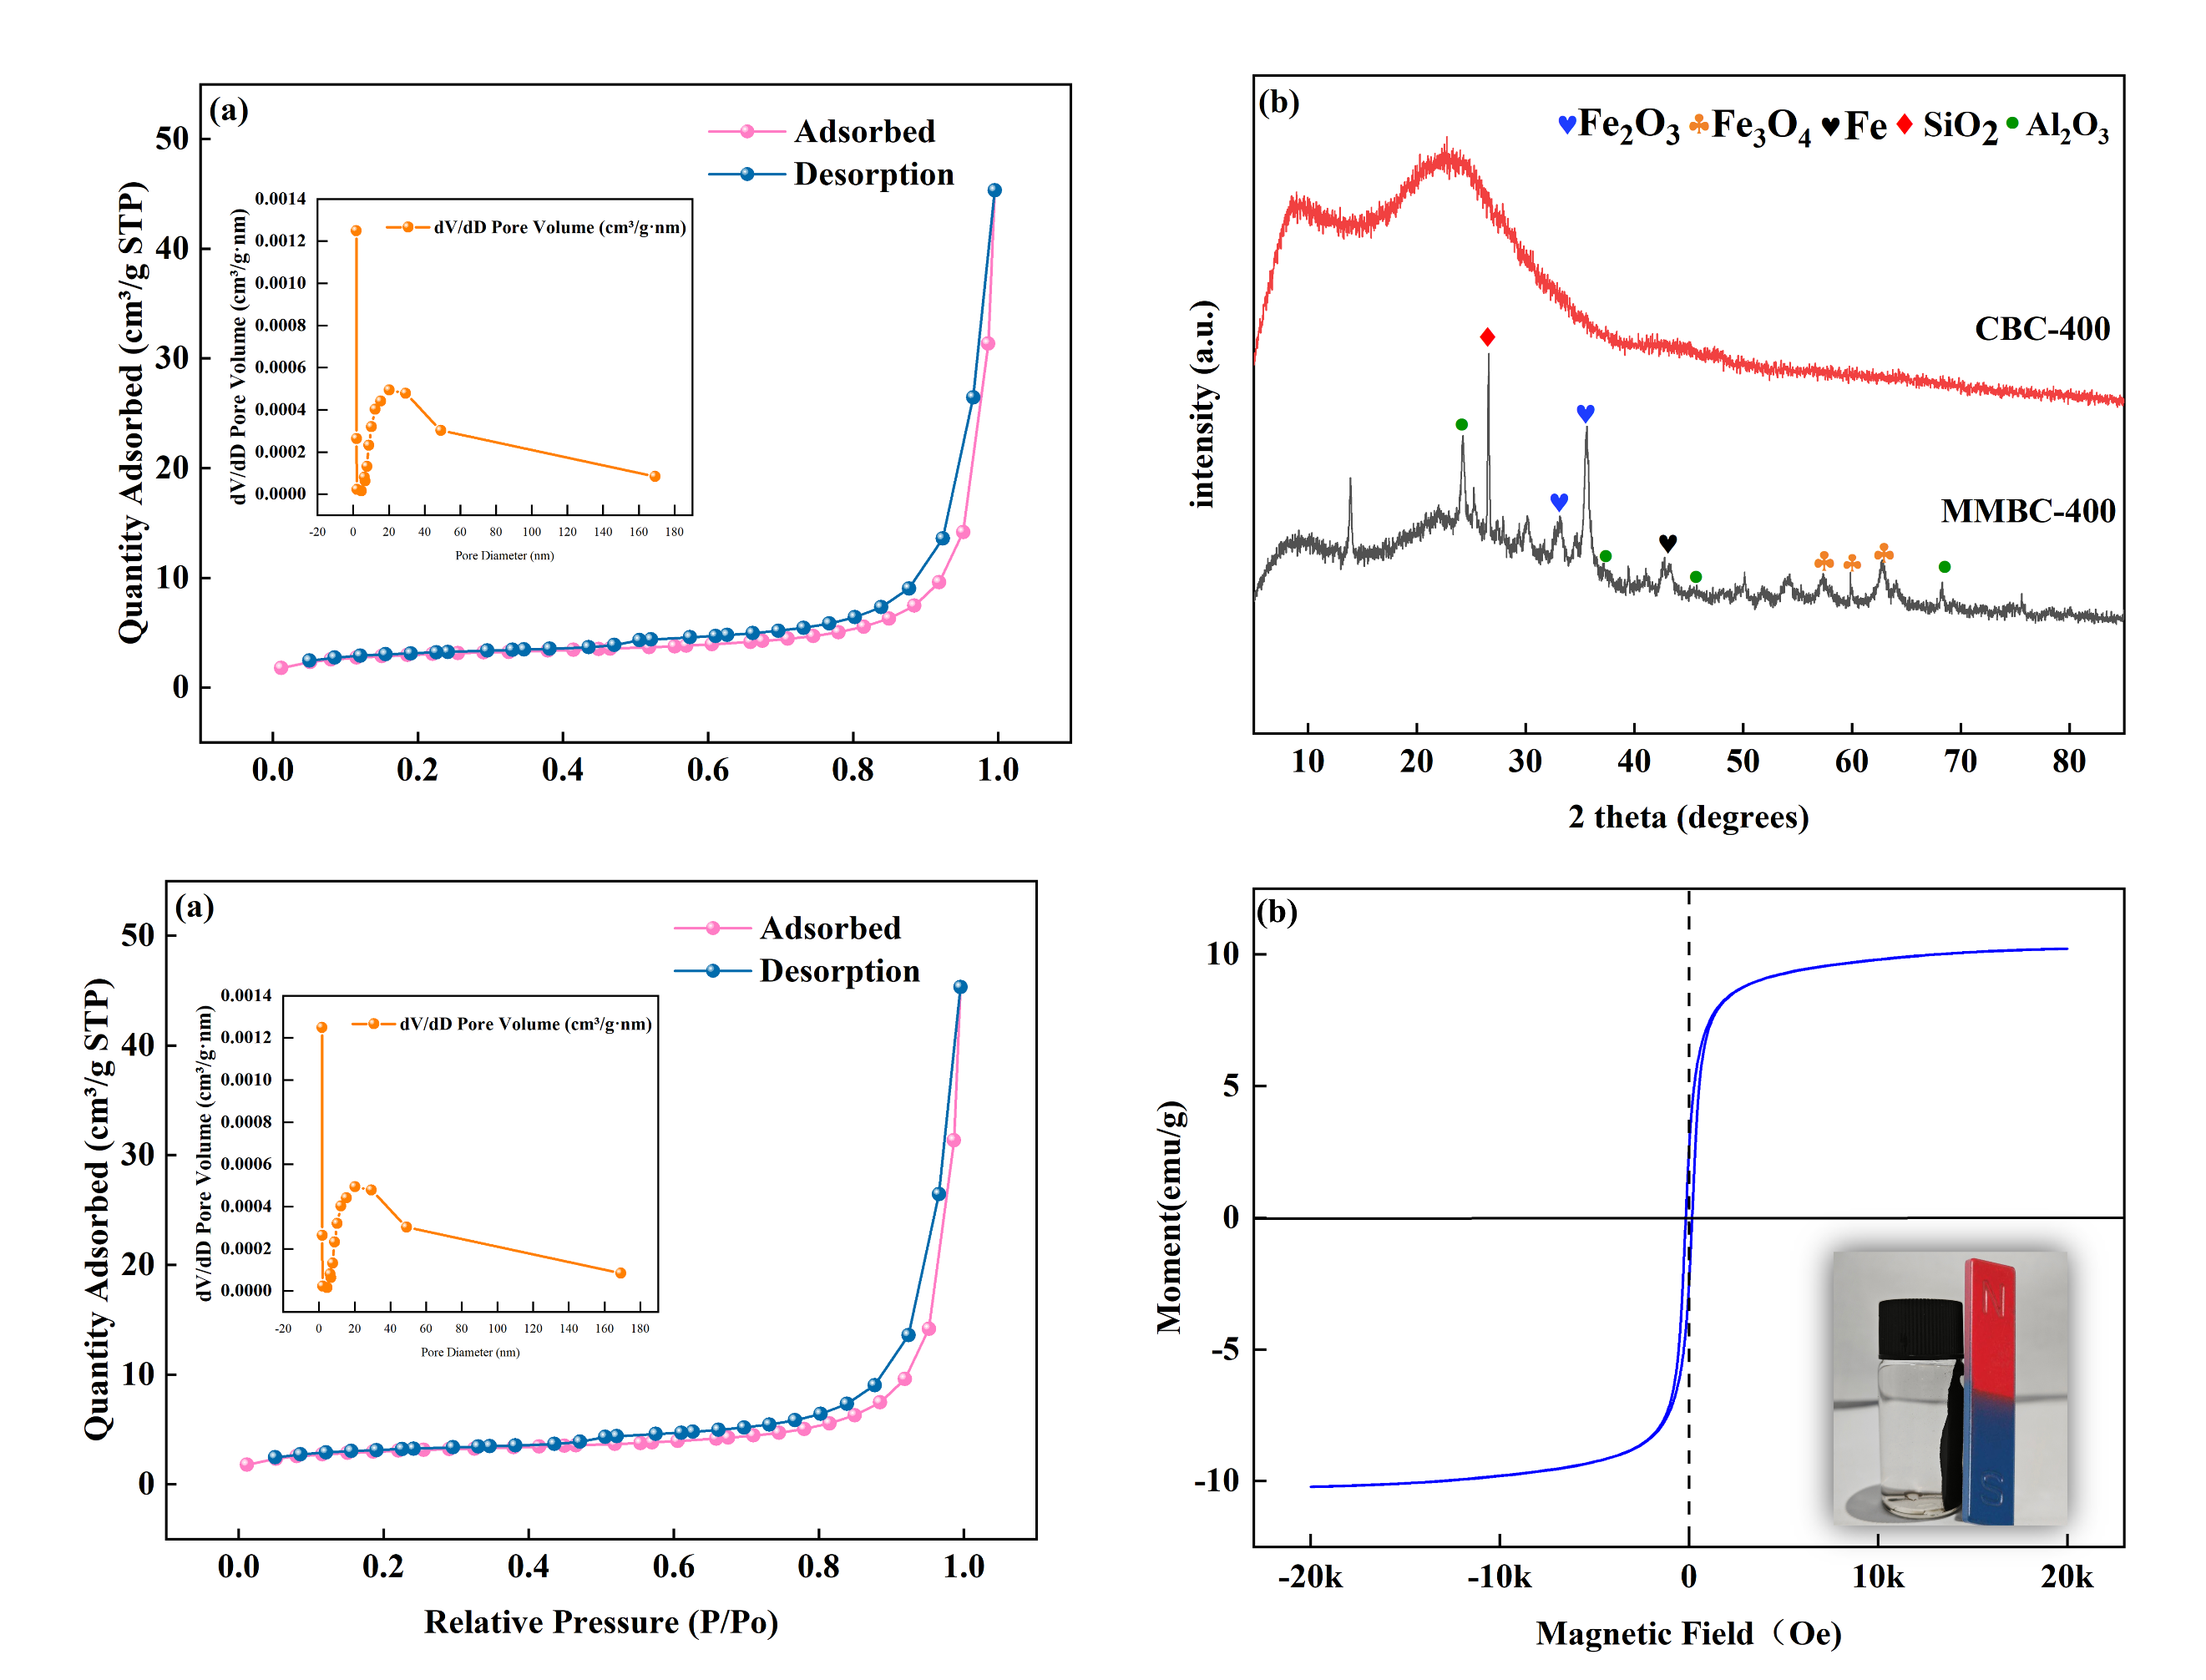


Fig.S2. N2 adsorption/desorption and pore size distributions of MMBC-400 (a),

VSM of MMBC-400(b)


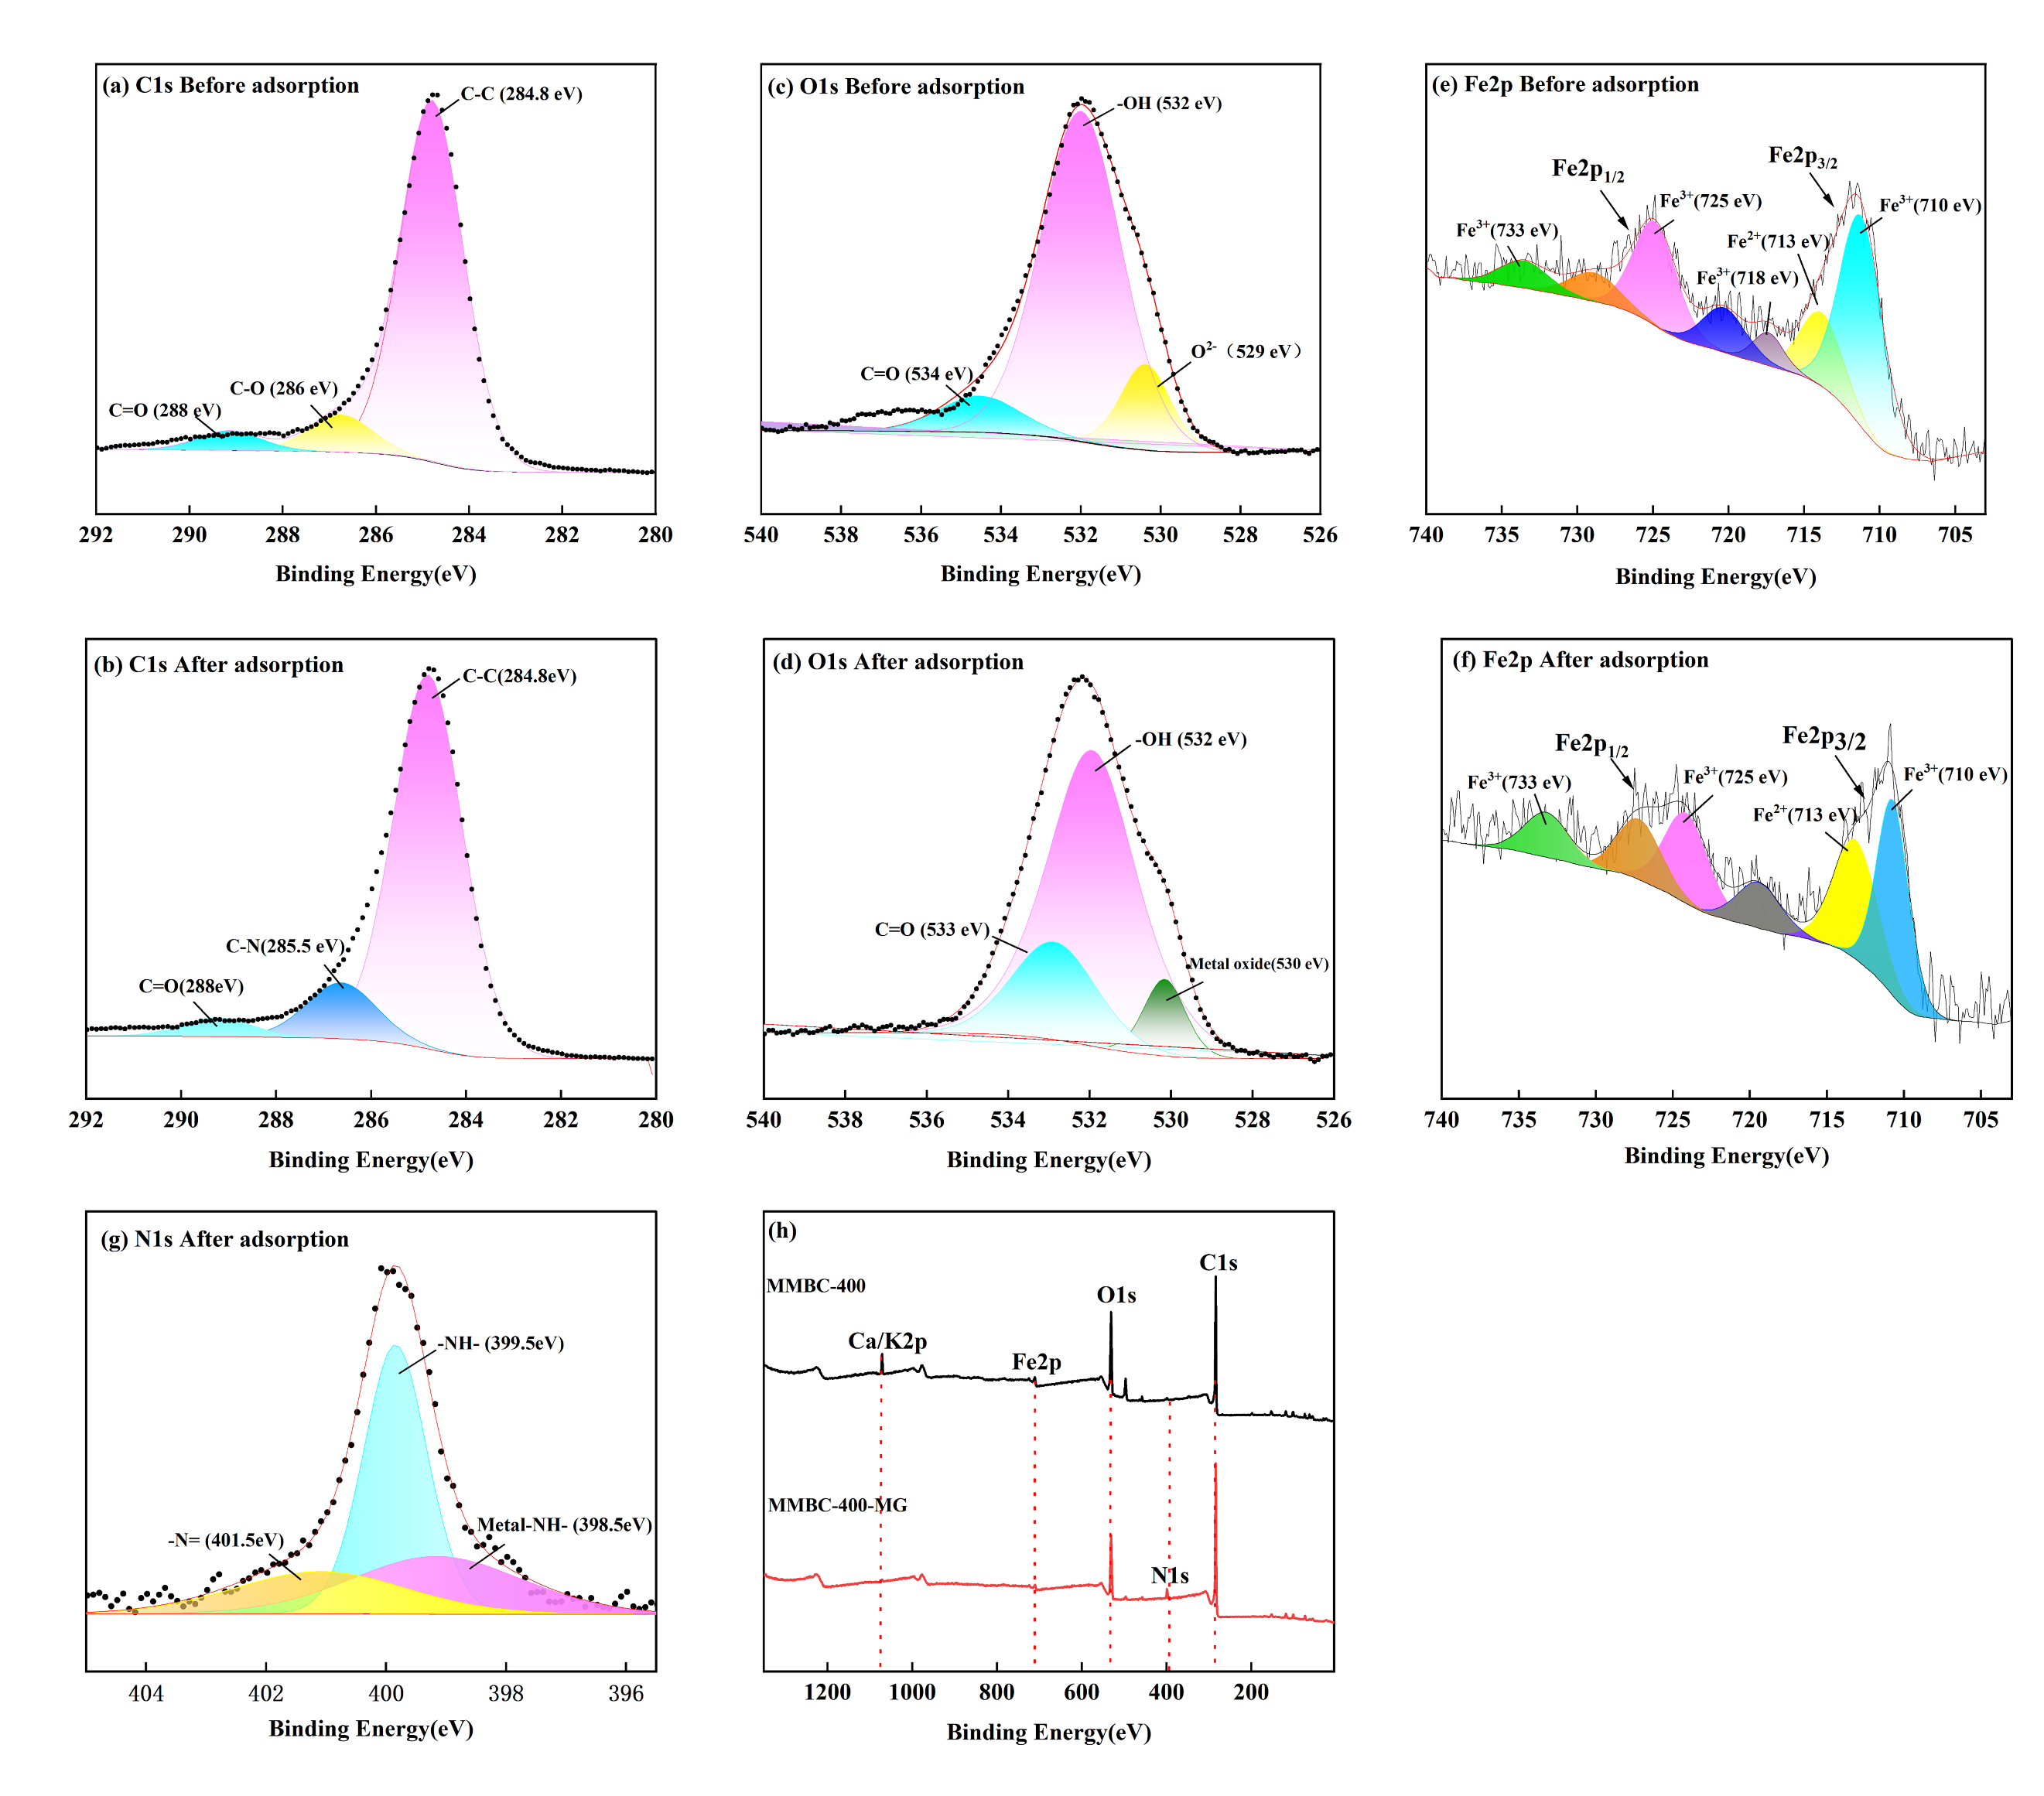


Fig.S3.XPS spectrum of MMBC-400 before and after MG adsorption: (a) C1s spectrum before adsorption; (b) C1s spectrum after adsorption; (c) O1s spectrum before adsorption; (d) O1s spectrum after adsorption; (e) Fe2p spectrum before adsorption; (f) Fe2p spectrum after adsorption; (g) N1s spectrum after adsorption; (h) Full spectrum before and after adsorption.


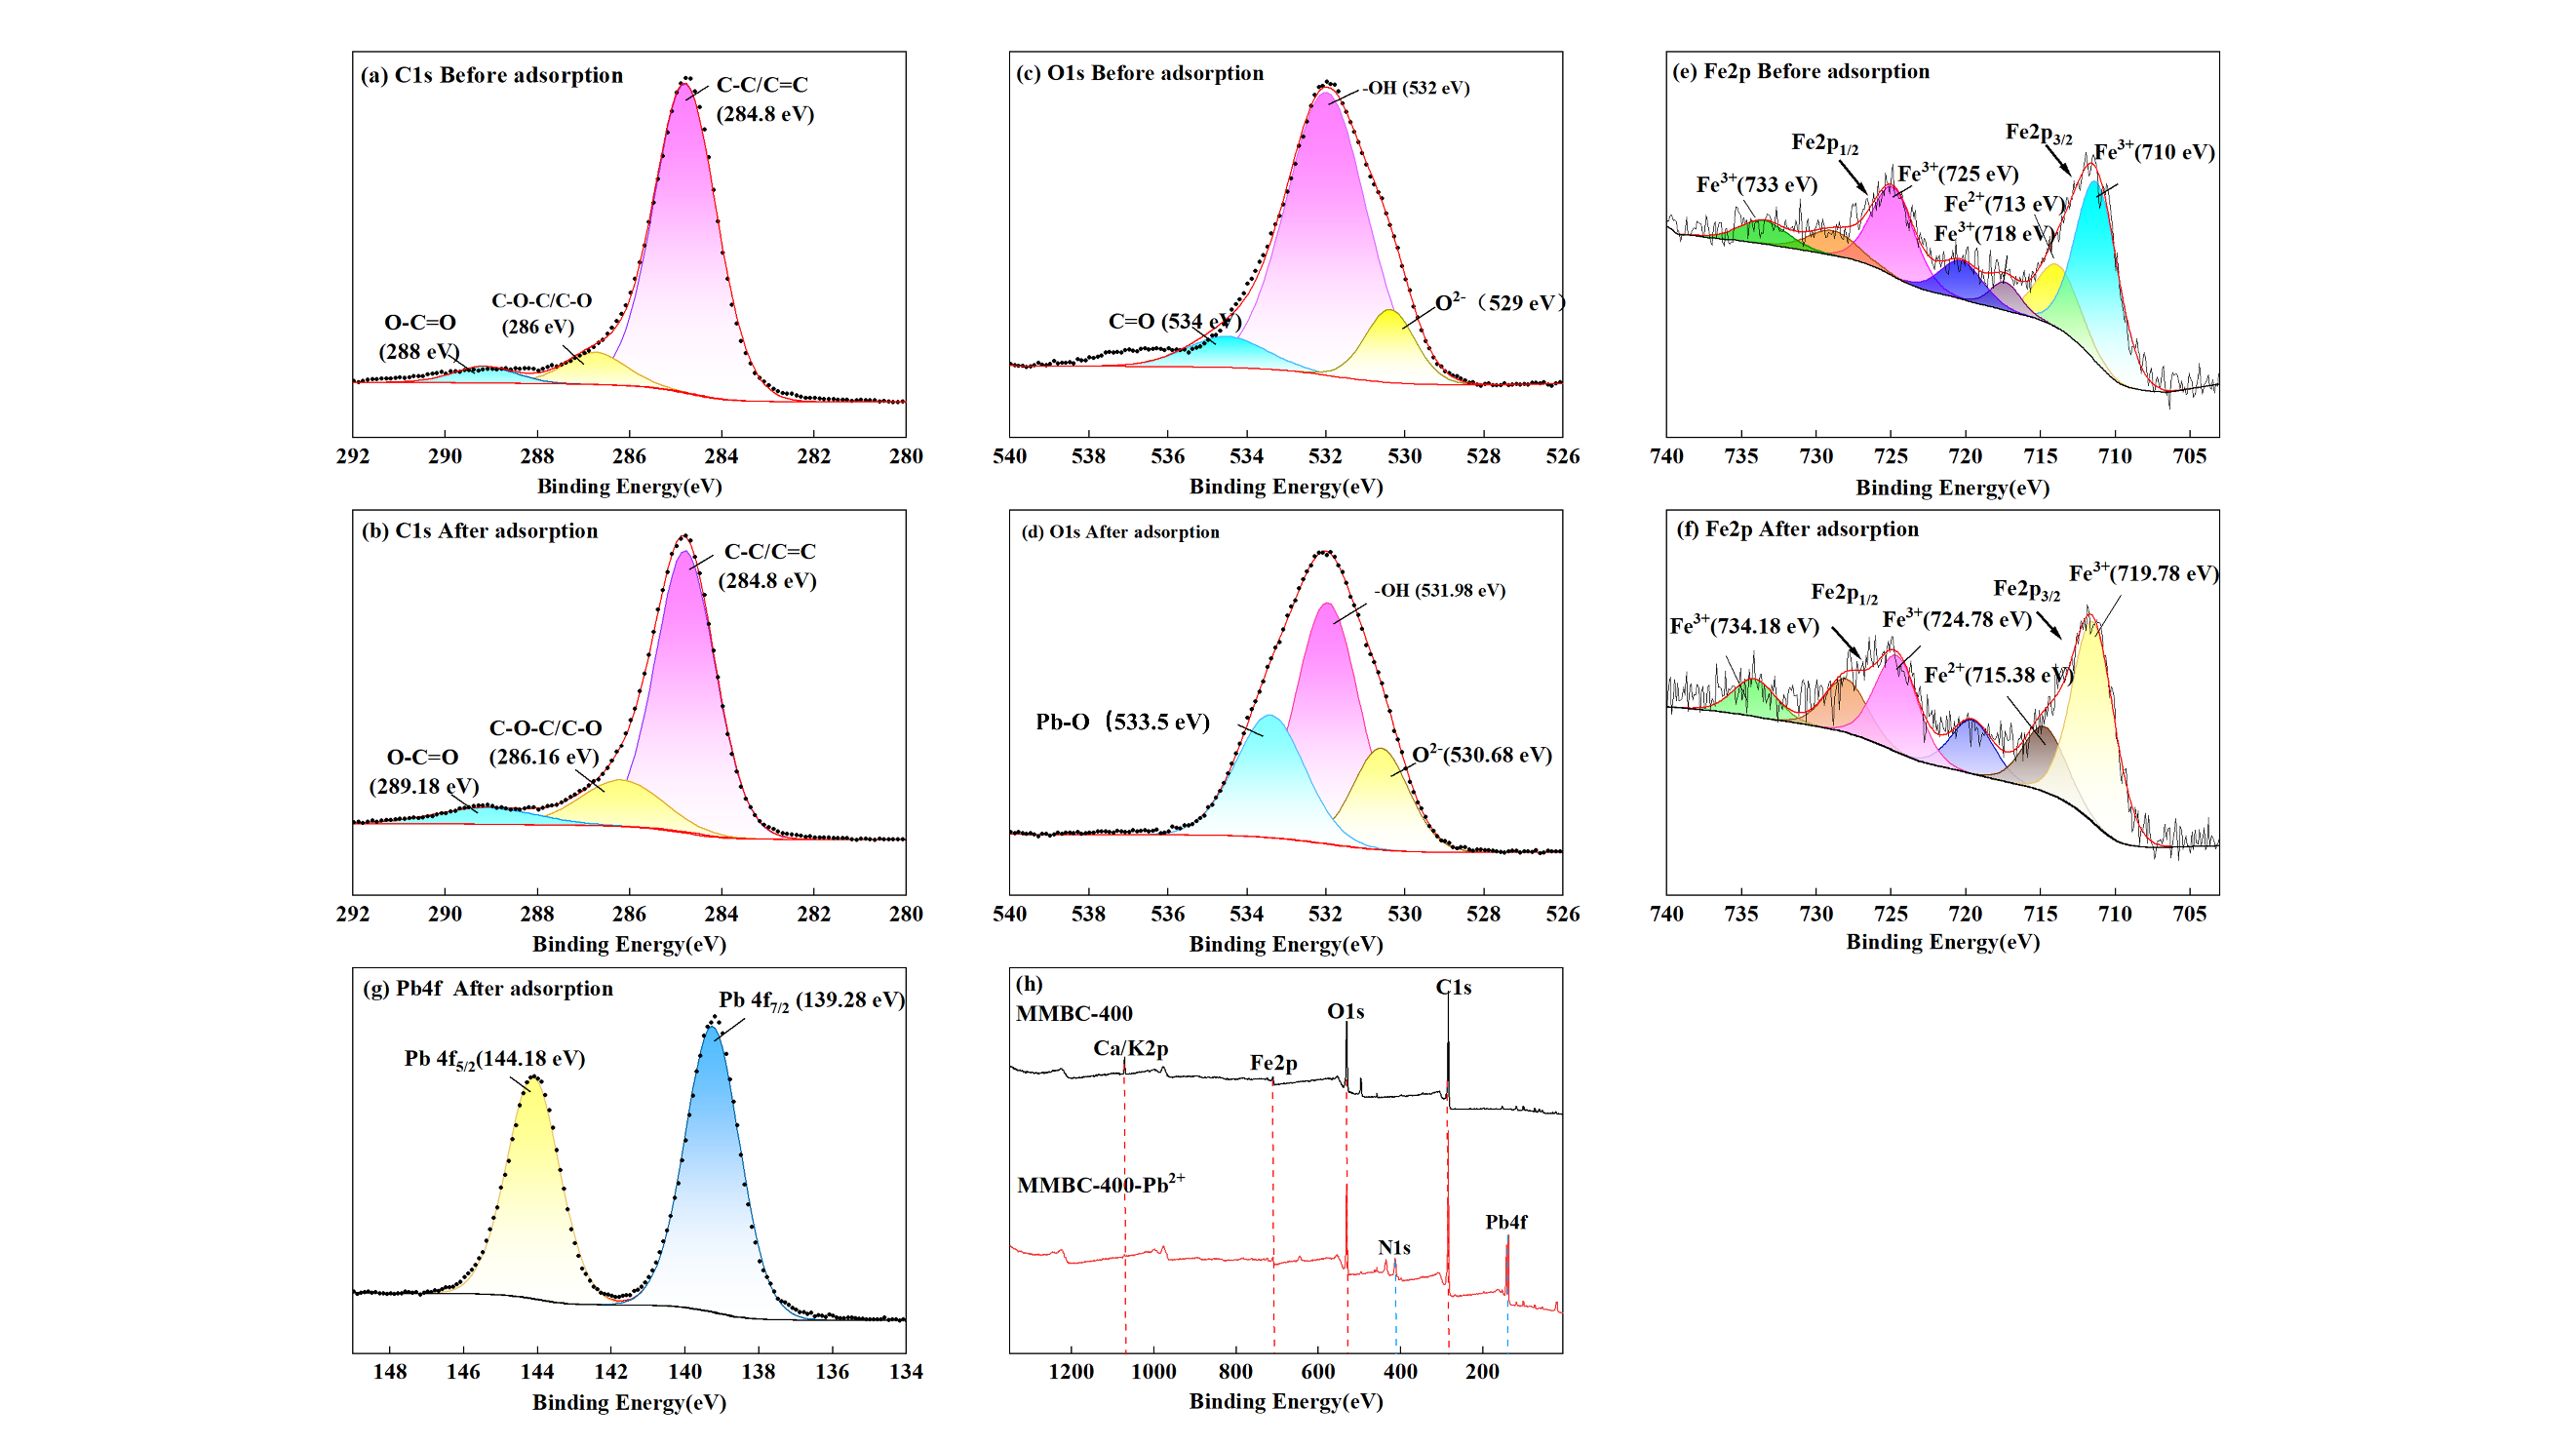


Fig.S4.XPS spectrum of MMBC-400 before and after Pb2+ adsorption: (a) C1s spectrum before adsorption; (b) C1s spectrum after adsorption; (c) O1s spectrum before adsorption; (d) O1s spectrum after adsorption; (e) Fe2p spectrum before adsorption; (f) Fe2p spectrum after adsorption; (g) Pb4f spectrum after adsorption; (h) Full spectrum before and after adsorption


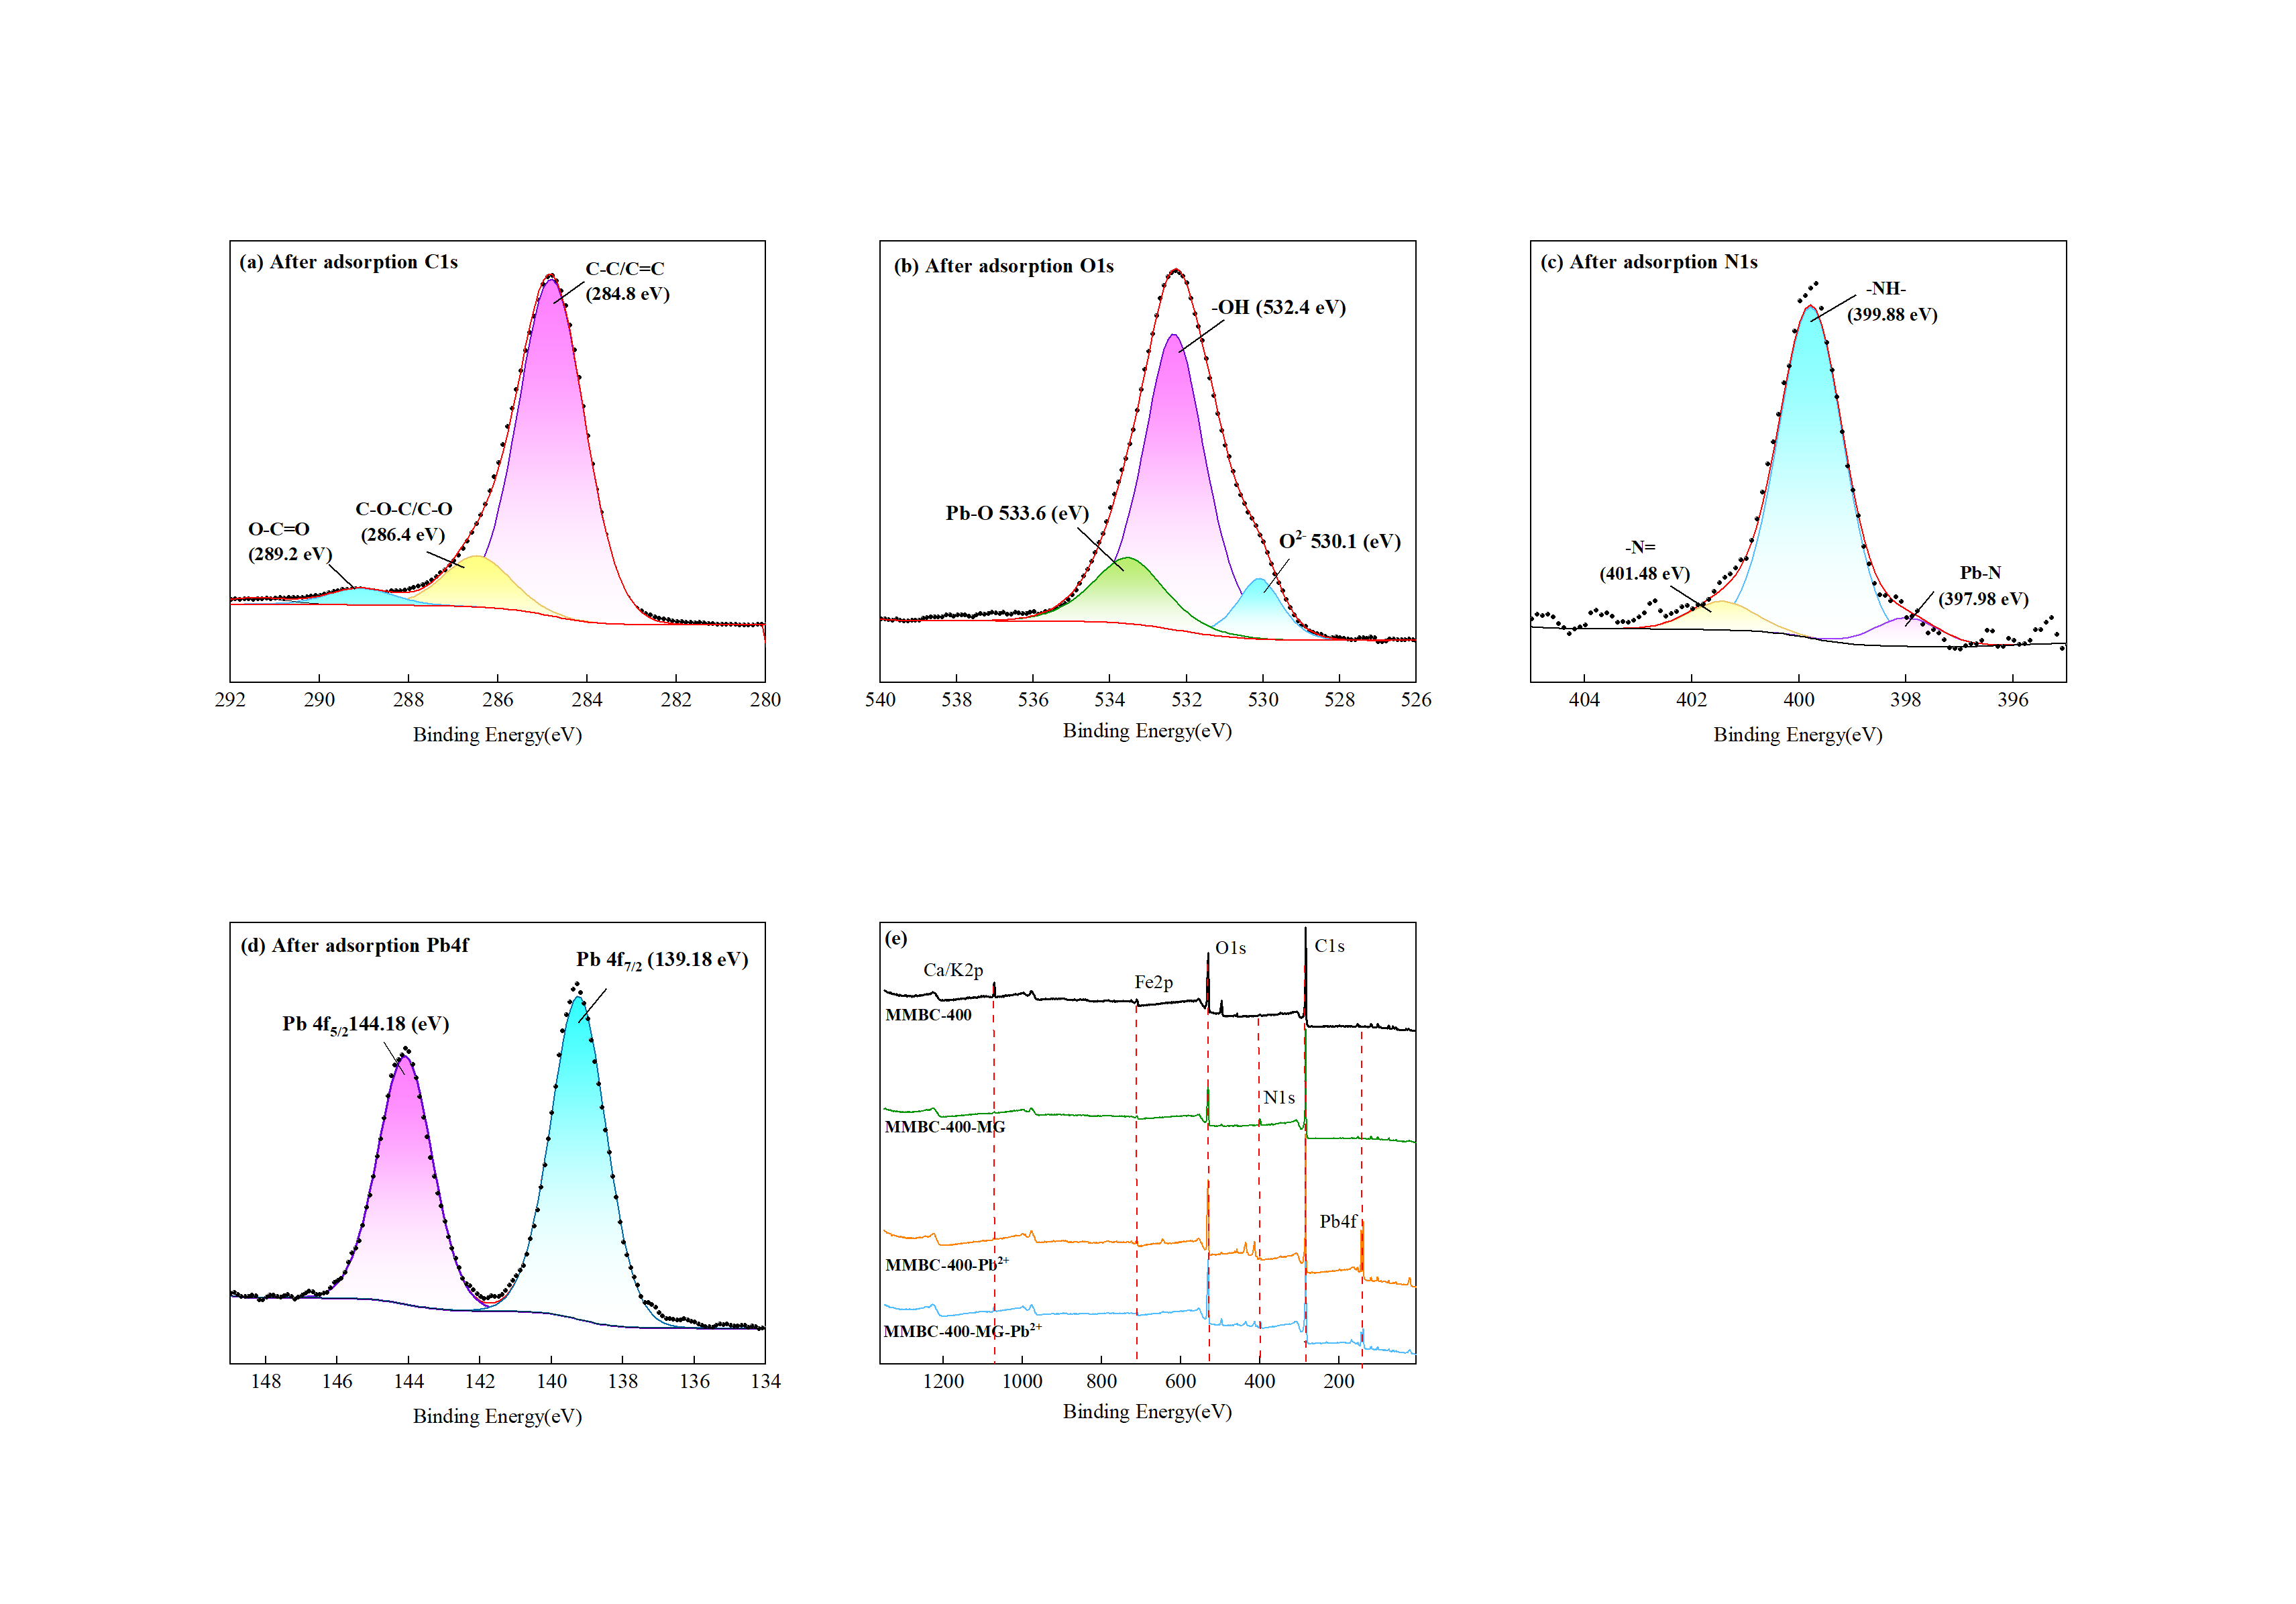


Fig.S5.**XPS spectra of C1s (a), O1s (b), N1s (c), and Pb 4f (d) for MMBC-400 after Pb2+ adsorption; total survey scans of XPS spectra (e)**

**
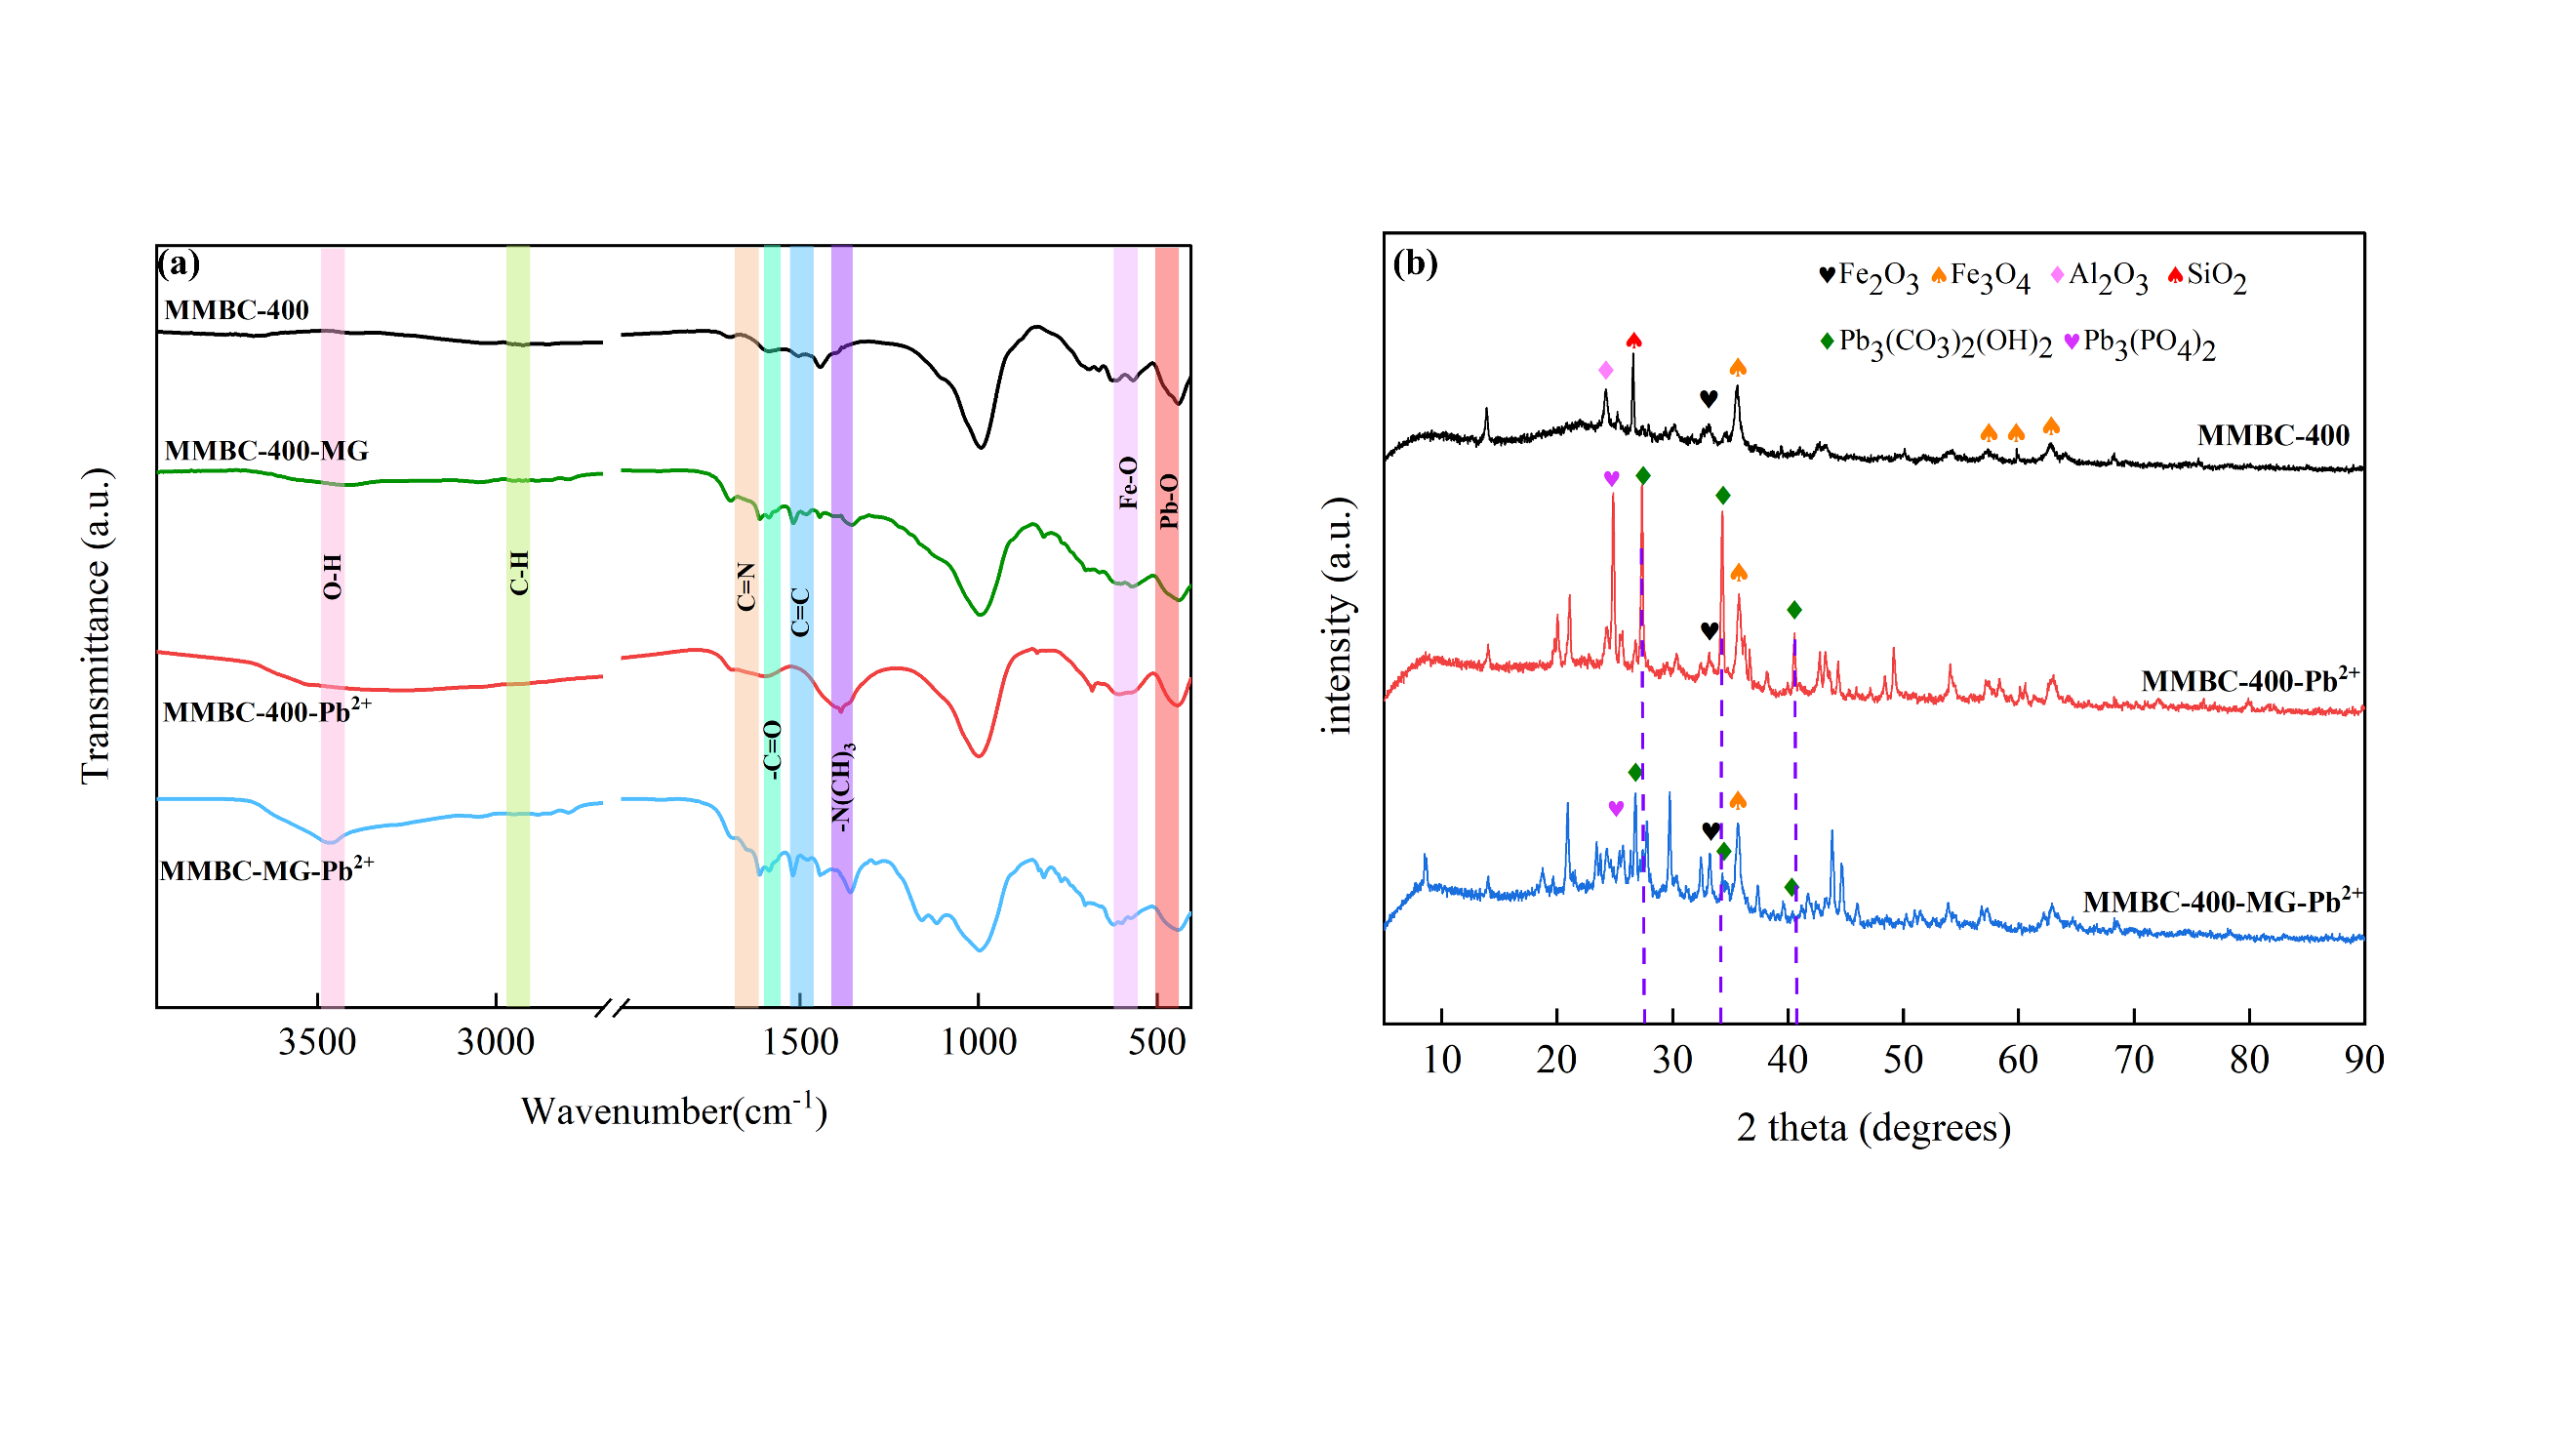
**

Fig.S6. FTIR spectra of MMBC-400 before and after adsorption of MG and Pb2+.


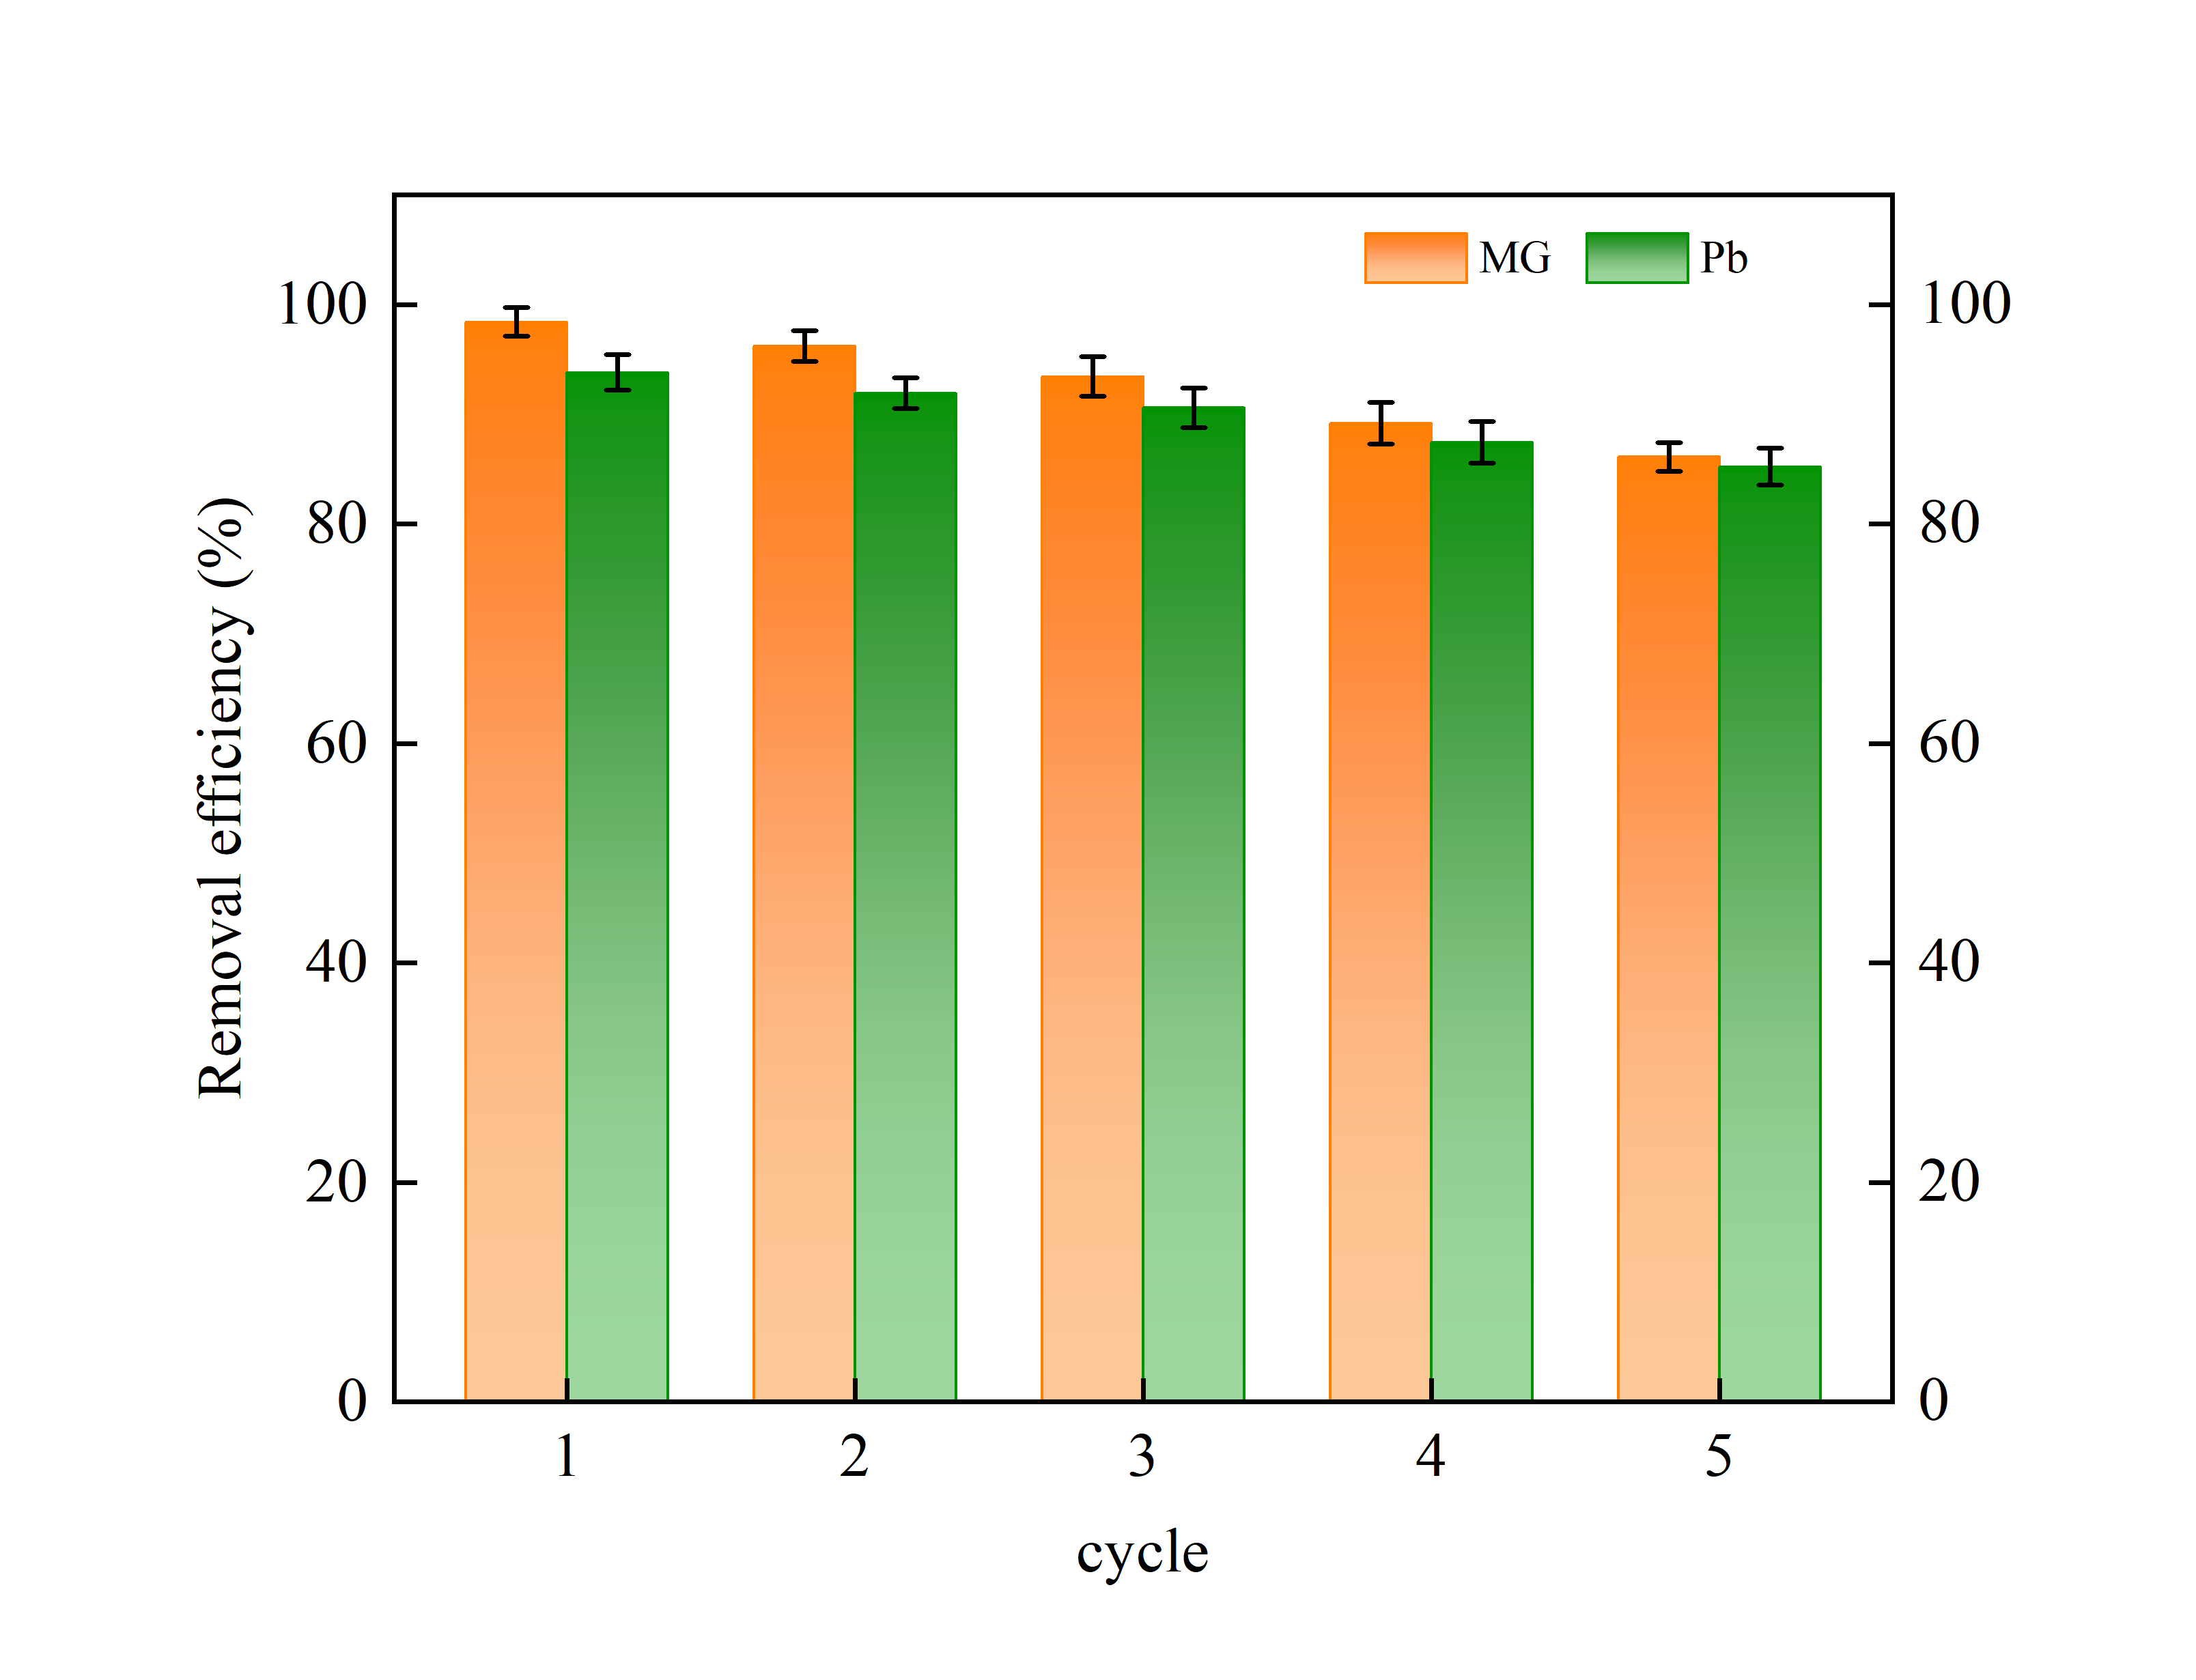


Fig.S7. Effect of reuse times on adsorption performance

Table S1 Isotherm fitting parameters of MMBC-400 for adsorbed MG and Pb2+ in binary systems

| Langmuir Freundlich |
| --- |
| T(K) KL(L/mg) Qe(mg/g) R2 Kf (L/g) n R2 |
| MG  293K 0.0113 633.30 0.976 3.18 1.38 0.986 |
| 298K 0.0332 748.72 0.977 5.69 2.69 0.993 |
| 303K 0.0633 809.55 0.977 7.58 3.85 0.985 |
| Pb2+ |
| 293K 0.0128 133.30 0.996 4.91 1.13 0.969 |
| 298K 0.0124 108.72 0.999 5.59 1.29 0.978 |
| 303K 0.0161 109.55 0.997 6.06 1.56 0.979 |

Table S2 Kinetic fitting parameters for MMBC-400 adsorption of MG and Pb2+ in a binary system

| Pseudo-first-order Pseudo-second-order |
| --- |
| T(K) qe(mg/g) k1(min−1) R2 qe(mg/g) k2(g·mg−1·min−1) R2 |
| MG |
| 293K 685.99 0.019 0.971 675.10 0.047 0.997 |
| 298K 775.27 0.223 0.948 772.62 0.031 0.998 |
| 303K 789.03 0.034 0.941 791.67 0.021 0.999 |
| Pb2+  293K 120.77 0.188 0.537 110.10 0.0074 0.997 |
| 298K 128.46 0.199 0.693 117.62 0.0071 0.998 |
| 303K 133.71 0.216 0.803 125.67 0.0072 0.998 |

Table S3 Thermodynamic parameters of MMBC-400 for adsorption of MG and Pb2+ in binary systems

| Temperature (K) ΔG (kJ/mol) ΔH (kJ/mol) ΔS (kJ/(mol·K)) |
| --- |
| MG  293K -20.28 |
| 298K -23.31 50.41 0.247 |
| 303K -25.31 |
| Pb2+ |
| 293K -19.21 |
| 298K -19.45 13.45 .228 |
| 303K -20.42 |
